# Supplementary material
Source: publisher figshare collection journal article supplement (https://acs.figshare.com/ndownloader/files/3760915)
Supplement: Supplementary file 1 [file 3760915]

## Supporting Information

### Microchannel Wetting for Controllable Patterning and Alignment of Silver Nanowire with High Resolution

Bo-Ru Yang,<sup>†,‡</sup> Wu Cao,<sup>†</sup> Gui-Shi Liu,<sup>†</sup> Hui-Jiuan Chen,<sup>‡</sup> Yong-Young Noh,<sup>§</sup> Takeo Minari,<sup>||</sup>  
Hsiang-Chih Hsiao,<sup>⊥</sup> Chia-Yu Lee,<sup>⊥</sup> Han-Ping D. Shieh,<sup>#</sup> and Chuan Liu<sup>\*,†,‡</sup>

<sup>†</sup> School of Microelectronics, School of Physics and Engineering, Guangdong Province Key Laboratory of Display Material and Technology, State Key Laboratory of Optoelectronic Materials and Technologies, Sun Yat-Sen University, Guangzhou 510275, People's Republic of China

<sup>‡</sup> SYSU-CMU Shunde International Joint Research Institute, Shunde 528000, People's Republic of China

<sup>§</sup> Department of Energy and Materials Engineering, Dongguk University, 26 Pil-dong, 3 ga, Jung-gu, Seoul 100-715, Republic of Korea

<sup>||</sup> International Center for Materials Nanoarchitectonics (WPI-MANA), National Institute for Materials Science (NIMS), Tsukuba, Ibaraki 305-0044, Japan

<sup>⊥</sup> Shenzhen China Star Optoelectronics Technology Co., Ltd., Guangming New District No. 9-2, Tangming Road, Shenzhen 518132, People's Republic of China

<sup>#</sup> Department of Photonics/Display Institute, National Chiao Tung University, Hsinchu 300, Taiwan

Corresponding Author

\*E-mail: [liuchuan5@sysu.edu.cn](mailto:liuchuan5@sysu.edu.cn)

Supplementary/Supporting Information:

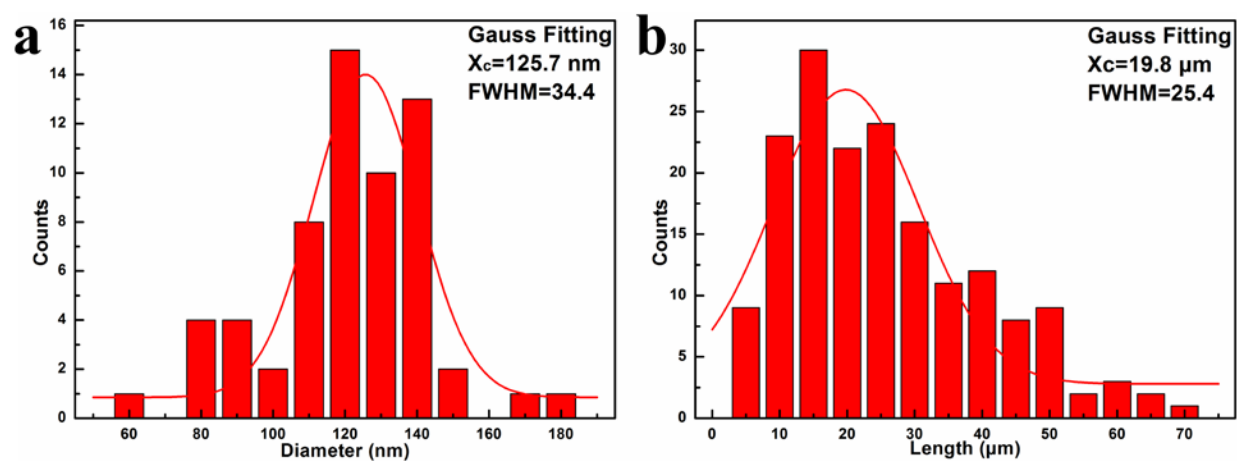

**Figure S1.** Histograms of statistics relating to the diameter (a) and length (b) of AgNWs ( $X_c$  is the mathematical expectation of Gauss fitting)

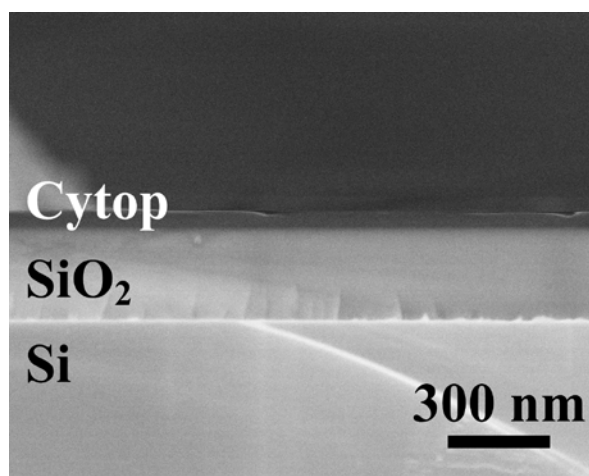

**Figure S2.** SEM section image of the substrate with Cytop pattern.

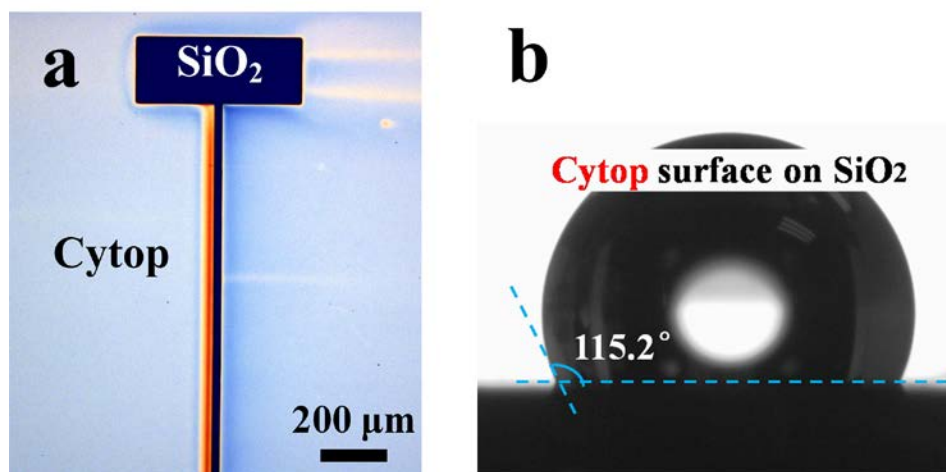

**Figure S3.** OM images of Cytop pattern fabricated by lift-off (a) and contact angle with DI-H<sub>2</sub>O on hydrophobic Cytop (b).

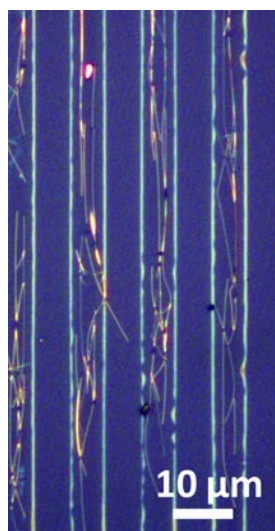

**Figure S4.** OM image of precisely patterned stripes without Cytop.

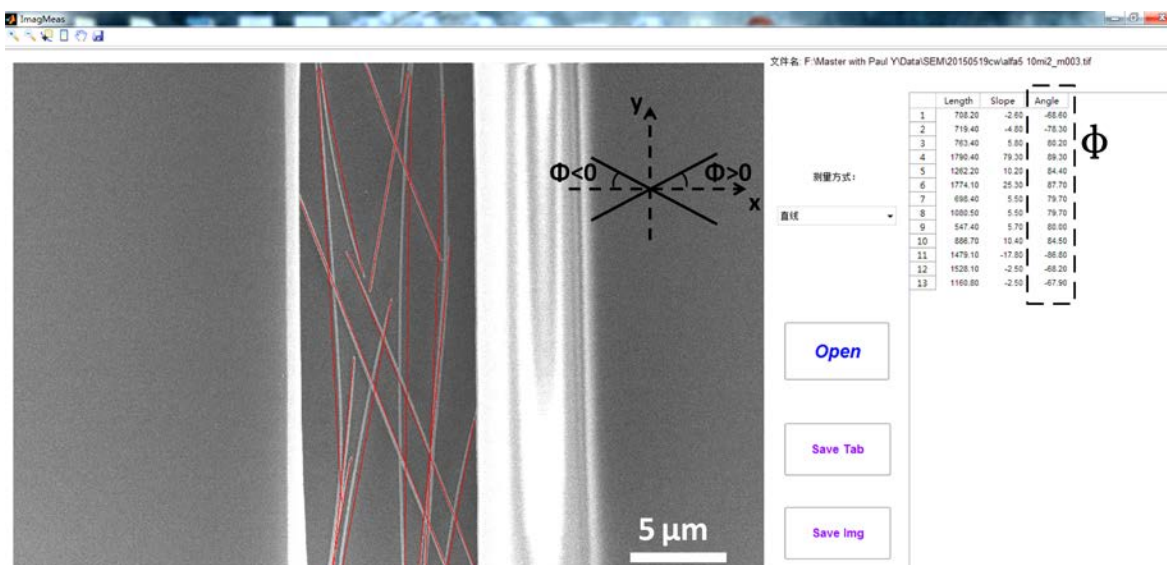

**Figure S5.** Graphic user interface of the tool used for measuring the angle distribution of NWs.

**Description:** The used tool called ImagMeas was compiled with Matlab language combining with graphic user interface design. It is an executive file (.exe) which can be executed individually for length or angle measurement.

**Table S1.**  $F(X_c)/F(0)$  and  $S_{FWHM}/S$  of each channel with different  $W/L_{NW}$ .

| $W/L_{NW}$    | 0.51 | 0.76 | 1.01 | 1.26  | 1.52  | 2.53 | $\infty$ |
|---------------|------|------|------|-------|-------|------|----------|
| $F(X_c)$      | 45.6 | 43.5 | 96.0 | 101.2 | 107.3 | 87.1 | 148.9    |
| $F(0)$        | 1.4  | 1.1  | 5.5  | 9.9   | 11.3  | 13.0 | 34.9     |
| $F(X_c)/F(0)$ | 32.6 | 39.5 | 17.5 | 10.2  | 9.5   | 6.7  | 4.3      |
| $S_{FWHM}/S$  | 69.6 | 72.1 | 67.6 | 65.5  | 65.3  | 68.9 | 46.5     |

**Movie S1.** Video of the coating and deposition procedures.
